# Supplementary material for: Preoperative CT-Based Skeletal Muscle Mass Depletion and Outcomes after Total Laryngectomy
Source: MDPI journal article supplement (doi:10.3390/cancers15143538), 2023-07-08
Supplement: s1 [file s1]

# Supplementary Materials: Preoperative CT-based skeletal muscle mass depletion and outcomes after total laryngectomy

Victoria Salati, Katerina Mandralis, Fabio Becce, Joachim Koerfer, Karma Lambercy, Christian Simon and François Gorostidi

**Table S1.** Univariate and multivariate analyses of factors associated with all wound-related complications.

|                              | Univariate        |              | Multivariate      |              |
|------------------------------|-------------------|--------------|-------------------|--------------|
|                              | OR (95% CI)       | P-value      | OR (95% CI)       | P-value      |
| Age                          | 0.97 (0.92-1.02)  | 0.206        |                   |              |
| Male gender                  | 1.06 (0.35-3.20)  | 0.916        |                   |              |
| BMI                          | 0.97 (0.90-1.04)  | 0.396        |                   |              |
| ASA ≥3                       | 1.33 (0.54-3.34)  | 0.537        |                   |              |
| Smoking                      | 1.52 (0.62-3.76)  | 0.359        |                   |              |
| SM depletion                 | 0.83 (0.35-1.98)  | 0.679        |                   |              |
| IMATI                        | 1.03 (0.93-1.16)  | 0.551        |                   |              |
| SMI                          | 0.98 (0.94-1.03)  | 0.462        |                   |              |
| SMRA                         | 1.00 (0.94-1.06)  | 0.962        |                   |              |
| Prior neck dissection        | 0.26 (0.05-0.95)  | 0.056        |                   |              |
| Prior locoregional RT        | 1.45 (0.61-3.52)  | 0.407        |                   |              |
| Prior chemotherapy           | 1.99 (0.74-5.63)  | 0.178        |                   |              |
| Prior tracheostomy           | 0.86 (0.29-2.54)  | 0.784        |                   |              |
| Flap reconstruction          | 3.63 (1.50-9.20)  | <b>0.005</b> | 2.91 (1.14-7.65)  | <b>0.027</b> |
| <b>Procedure</b>             |                   |              |                   |              |
| Total laryngectomy           | -                 | -            |                   |              |
| Pharyngolaryngectomy         | 2.92 (1.22-7.25)  | <b>0.018</b> | 2.16 (0.84-5.61)  | 0.109        |
| Neck dissection              | 1.62 (0.26-12.79) | 0.609        |                   |              |
| <b>Tumor location</b>        |                   |              |                   |              |
| Laryngeal                    | -                 | -            |                   |              |
| Pharyngeal                   | 2.16 (0.66-7.82)  | 0.214        |                   |              |
| Laryngo-pharyngeal           | 1.80 (0.57-6.03)  | 0.321        |                   |              |
| <b>Indication of surgery</b> |                   |              |                   |              |
| Primary                      | -                 | -            |                   |              |
| Salvage                      | 3.89 (1.14-10.87) | <b>0.007</b> | 3.64 (0.28-95.49) | 0.350        |

\* Significant p-values (<0.05) are displayed in bold characters.
